# Supplementary material for: Specific insulin-like peptides encode sensory information to regulate distinct developmental processes
Source: Oxford University Press journal article supplement (doi:10.1242/dev.060905), 2011-02-22
Supplement: dev060905figs3.pdf [file dev060905figs3.pdf]

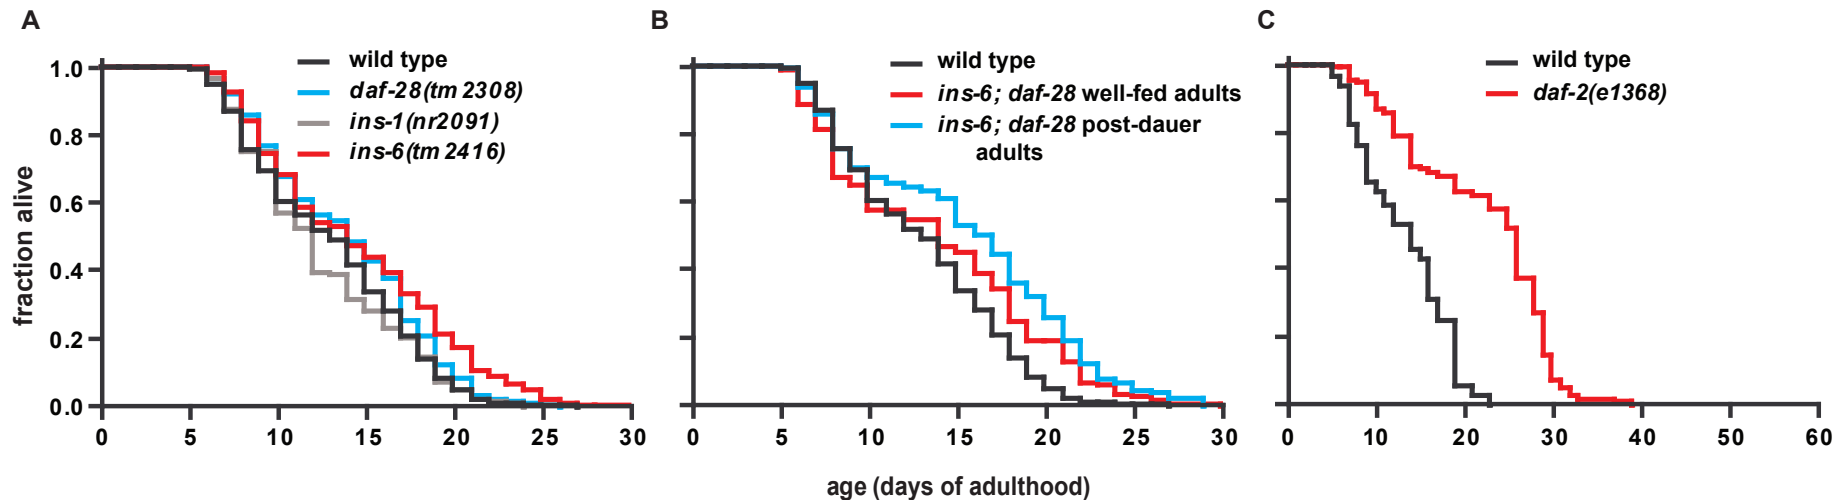

**D**

Table. Adult lifespans of insulin mutants

| Strain                                    | Mean Lifespan $\pm$ SEM (Days) | 75 <sup>th</sup> Percentile (Days) | No. Animals Observed / Total Initial Animals | % Wild Type | <i>P</i> Value Against Wild Type (Logrank) |
|-------------------------------------------|--------------------------------|------------------------------------|----------------------------------------------|-------------|--------------------------------------------|
| <u>25°C</u>                               |                                |                                    |                                              |             |                                            |
| Wild Type                                 | 13.0 $\pm$ 0.1                 | 17                                 | 1177/1389 (10)                               |             |                                            |
| <i>ins-6(tm2416)</i>                      | 14.5 $\pm$ 0.3                 | 19                                 | 483/597 (6)                                  | +12         | < 0.0001                                   |
| <i>daf-28(tm2308)</i>                     | 13.9 $\pm$ 0.2                 | 18                                 | 570/700 (7)                                  | +7          | < 0.0001                                   |
| <i>ins-1(nr2091)</i>                      | 12.6 $\pm$ 0.3                 | 16                                 | 279/397 (4)                                  | -3          | 0.35                                       |
| <i>ins-6(tm2416); daf-28(tm2308)</i>      |                                |                                    |                                              |             |                                            |
| continuously well-fed adults              | 13.9 $\pm$ 0.4                 | 18                                 | 208/299 (3)                                  | +7          | < 0.0001                                   |
| post-dauer adults                         | 15.4 $\pm$ 0.4                 | 21                                 | 207/300 (3)                                  | +19         | < 0.0001                                   |
|                                           |                                |                                    |                                              |             | ] +11 ( <i>P</i> = 0.01)                   |
| <u>20°C <math>\rightarrow</math> 25°C</u> |                                |                                    |                                              |             |                                            |
| Wild Type                                 | 13.3 $\pm$ 0.4                 | 17                                 | 170/200 (2)                                  |             |                                            |
| <i>ins-6(tm2416)</i>                      | 13.6 $\pm$ 0.4                 | 19                                 | 150/200 (2)                                  | +3          | 0.38                                       |
| <i>daf-28(tm2308)</i>                     | 12.8 $\pm$ 0.5                 | 17                                 | 82/100 (1)                                   | -4          | 0.33                                       |
| <i>ins-1(nr2091)</i>                      | 12.2 $\pm$ 0.5                 | 16                                 | 71/100 (1)                                   | -8          | 0.03                                       |
| <i>daf-2(e1368)</i>                       | 22.1 $\pm$ 0.6                 | 29                                 | 152/100 (2)                                  | +66         | < 0.0001                                   |
