# Supplementary material for: Specific insulin-like peptides encode sensory information to regulate distinct developmental processes
Source: Oxford University Press journal article supplement (doi:10.1242/dev.060905), 2011-02-22
Supplement: dev060905tables1.pdf [file dev060905tables1.pdf]

Table S1. Dauer entry phenotypes of wild-type and insulin-deficient worms

| Strain/treatment                                        | Mean fraction of dauers $\pm$ s.e.m. | Total no. of animals observed (no. of trials) | P-value against control* | P-value against specified groups |
|---------------------------------------------------------|--------------------------------------|-----------------------------------------------|--------------------------|----------------------------------|
| <b>25°C</b>                                             |                                      |                                               |                          |                                  |
| Wild type*                                              | 0.00 $\pm$ 0.00                      | 1005 (10)                                     |                          |                                  |
| <i>ins-1(nr2091)</i>                                    | 0.00 $\pm$ 0.00                      | 368 (4)                                       | n.s.                     |                                  |
| <i>ins-6(tm2416)</i>                                    | 0.00 $\pm$ 0.00                      | 566 (6)                                       | n.s.                     |                                  |
| <i>daf-28(tm2308)</i>                                   | 0.02 $\pm$ 0.01                      | 705 (7)                                       | 0.004                    |                                  |
| <i>ins-6; ins-1</i>                                     | 0.00 $\pm$ 0.00                      | 277 (3)                                       | n.s.                     |                                  |
| <i>ins-1; daf-28</i>                                    | 0.04 $\pm$ 0.01                      | 494 (5)                                       | 0.004                    | n.s. <sup>†</sup>                |
| <i>ins-6; daf-28</i>                                    | 0.36 $\pm$ 0.04                      | 1061 (10)                                     | <0.0001                  | 0.0006 <sup>†</sup>              |
| <i>ins-6; ins-1; daf-28</i>                             | 0.30 $\pm$ 0.06                      | 392 (3)                                       | 0.002                    | n.s. <sup>‡</sup>                |
| <b>20°C</b>                                             |                                      |                                               |                          |                                  |
| Wild type                                               | 0.00 $\pm$ 0.00                      | 608 (6)                                       | n.s.                     |                                  |
| <i>daf-2(e1368)*</i>                                    | 0.00 $\pm$ 0.00                      | 595 (6)                                       |                          |                                  |
| <i>daf-2; daf-28</i>                                    | 0.76 $\pm$ 0.08                      | 444 (4)                                       | 0.002                    |                                  |
| <i>daf-2; ins-1; daf-28</i>                             | 0.44 $\pm$ 0.09                      | 621 (6)                                       | 0.004                    | 0.06 <sup>§</sup>                |
| <i>ins-6; daf-2; daf-28</i>                             | 0.92 $\pm$ 0.05                      | 437 (4)                                       | 0.004                    | n.s. <sup>§</sup>                |
| <i>ins-6; daf-2; ins-1; daf-28</i>                      | 0.93 $\pm$ 0.04                      | 419 (4)                                       | 0.004                    | n.s. <sup>¶</sup>                |
| <b>27°C</b>                                             |                                      |                                               |                          |                                  |
| Wild type*                                              | 0.01 $\pm$ 0.01                      | 1262 (13)                                     |                          |                                  |
| <i>ins-1</i>                                            | 0.02 $\pm$ 0.01                      | 730 (8)                                       | n.s.                     |                                  |
| <i>ins-6</i>                                            | 0.06 $\pm$ 0.02                      | 849 (9)                                       | 0.007                    |                                  |
| <i>daf-28</i>                                           | 0.74 $\pm$ 0.04                      | 873 (9)                                       | <0.0001                  |                                  |
| <i>ins-6; ins-1</i>                                     | 0.11 $\pm$ 0.05                      | 353 (4)                                       | 0.04                     |                                  |
| <i>ins-1; daf-28</i>                                    | 0.79 $\pm$ 0.07                      | 605 (6)                                       | 0.0003                   | n.s. <sup>†</sup>                |
| <i>ins-6; daf-28</i>                                    | 1.00 $\pm$ 0.00                      | 903 (9)                                       | <0.0001                  | 0.0001 <sup>†</sup>              |
| <i>ins-6; ins-1; daf-28</i>                             | 1.00 $\pm$ 0.00                      | 328 (3)                                       | 0.004                    | n.s. <sup>‡</sup>                |
| <b>22.5°C</b>                                           |                                      |                                               |                          |                                  |
| Wild type                                               | 0.00 $\pm$ 0.00                      | 488 (5)                                       | 0.009                    |                                  |
| <i>daf-2*</i>                                           | 0.29 $\pm$ 0.07                      | 487 (5)                                       |                          |                                  |
| <i>daf-2; ins-1</i>                                     | 0.10 $\pm$ 0.03                      | 476 (5)                                       | 0.03                     |                                  |
| <i>ins-6; daf-2</i>                                     | 0.36 $\pm$ 0.08                      | 487 (5)                                       | n.s.                     |                                  |
| <i>ins-6; daf-2; ins-1</i>                              | 0.14 $\pm$ 0.03                      | 487 (5)                                       | 0.08                     | 0.03**                           |
| <i>daf-2; daf-28</i>                                    | 0.99 $\pm$ 0.00                      | 509 (5)                                       | 0.009                    |                                  |
| <i>daf-2; ins-1; daf-28</i>                             | 0.97 $\pm$ 0.01                      | 510 (5)                                       | 0.009                    | 0.05 <sup>§</sup>                |
| <i>ins-6; daf-2; daf-28</i>                             | 1.00 $\pm$ 0.00                      | 503 (5)                                       | 0.005                    |                                  |
| <i>ins-6; daf-2; ins-1; daf-28</i>                      | 1.00 $\pm$ 0.00                      | 299 (3)                                       | 0.02                     | n.s. <sup>¶</sup>                |
| <b>25°C</b>                                             |                                      |                                               |                          |                                  |
| Wild type                                               | 0.00 $\pm$ 0.00                      | 486 (5)                                       |                          |                                  |
| <i>daf-16*</i>                                          | 0.00 $\pm$ 0.00                      | 501 (5)                                       | n.s.                     |                                  |
| <i>ins-6; daf-28</i>                                    | 0.21 $\pm$ 0.05                      | 504 (5)                                       | 0.005                    | 0.005 <sup>††</sup>              |
| <i>daf-16; ins-6; daf-28</i>                            | 0.01 $\pm$ 0.01                      | 491 (5)                                       | n.s.                     | 0.008 <sup>‡</sup>               |
| <i>ins-6; ins-1; daf-28</i>                             | 0.25 $\pm$ 0.06                      | 426 (5)                                       | 0.005                    | n.s. <sup>‡</sup>                |
| <i>daf-16; ins-6; ins-1; daf-28</i>                     | 0.00 $\pm$ 0.00                      | 458 (5)                                       | n.s.                     | 0.005 <sup>‡‡</sup>              |
| <b><i>ins-6</i> rescues</b>                             |                                      |                                               |                          |                                  |
| <b>25°C</b>                                             |                                      |                                               |                          |                                  |
| <i>ofm-1p::gfp</i> (25 ng)                              |                                      |                                               |                          |                                  |
| <i>wild type; jxEx18*</i>                               | 0.00 $\pm$ 0.00                      | 594 (5)                                       |                          |                                  |
| <i>wild type; jxEx21*</i>                               | 0.00 $\pm$ 0.00                      | 477 (5)                                       |                          |                                  |
| <i>wild type; jxEx22*</i>                               | 0.00 $\pm$ 0.00                      | 477 (5)                                       |                          |                                  |
| <i>daf-28; jxEx18</i>                                   | 0.03 $\pm$ 0.02                      | 337 (5)                                       | n.s. <sup>§§</sup>       | 0.008***                         |
| <i>daf-28; jxEx21</i>                                   | 0.02 $\pm$ 0.01                      | 516 (5)                                       | 0.05 <sup>§§</sup>       | 0.009***                         |
| <i>daf-28; jxEx22</i>                                   | 0.01 $\pm$ 0.01                      | 414 (4)                                       | n.s. <sup>§§</sup>       | 0.01***                          |
| <i>ins-6; daf-28; jxEx18</i>                            | 0.47 $\pm$ 0.05                      | 554 (5)                                       | 0.005 <sup>§§</sup>      |                                  |
| <i>ins-6; daf-28; jxEx21</i>                            | 0.31 $\pm$ 0.06                      | 559 (5)                                       | 0.005 <sup>§§</sup>      |                                  |
| <i>ins-6; daf-28; jxEx22</i>                            | 0.34 $\pm$ 0.06                      | 532 (5)                                       | 0.007 <sup>§§</sup>      |                                  |
| Full rescue (low)                                       |                                      |                                               |                          |                                  |
| <i>ins-6p::ins-6</i> (2 ng); <i>ofm-1p::gfp</i> (25 ng) |                                      |                                               |                          |                                  |

|                                                   |           |         |                     |         |
|---------------------------------------------------|-----------|---------|---------------------|---------|
| <i>ins-6; daf-28; jxEx27</i>                      | 0.01±0.00 | 638 (5) | <0.01 <sup>¶¶</sup> |         |
| <i>ins-6; daf-28; jxEx28</i>                      | 0.01±0.01 | 682 (5) | <0.01 <sup>¶¶</sup> |         |
| <i>ins-6; daf-28; jxEx29</i>                      | 0.01±0.00 | 571 (5) | <0.01 <sup>¶¶</sup> |         |
| Full rescue (high)                                |           |         |                     |         |
| <i>ins-6p::ins-6 (25 ng); ofm-1p::gfp (25 ng)</i> |           |         |                     |         |
| <i>ins-6; daf-28; yxEx163</i>                     | 0.00±0.00 | 175 (2) |                     |         |
| <i>ins-6; daf-28; yxEx174</i>                     | 0.02±0.02 | 264 (2) |                     |         |
| <i>ins-6; daf-28; yxEx175</i>                     | 0.01±0.01 | 215 (2) |                     |         |
| ASI-specific rescue (low)                         |           |         |                     |         |
| <i>str-3p::ins-6 (2 ng); ofm-1p::gfp (25 ng)</i>  |           |         |                     |         |
| <i>ins-6; daf-28; jxEx53</i>                      | 0.23      | 47 (1)  |                     |         |
| <i>ins-6; daf-28; jxEx54</i>                      | 0.01      | 96 (1)  |                     |         |
| <i>ins-6; daf-28; jxEx64</i>                      | 0.10      | 114 (1) |                     |         |
| <i>ins-6; daf-28; jxEx65</i>                      | 0.23      | 105 (1) |                     |         |
| <i>ins-6; daf-28; jxEx66</i>                      | 0.26      | 100 (1) |                     |         |
| ASI-specific rescue (high)                        |           |         |                     |         |
| <i>str-3p::ins-6 (25 ng); ofm-1p::gfp (25 ng)</i> |           |         |                     |         |
| <i>ins-6; daf-28; jxEx50</i>                      | 0.00±0.00 | 479 (2) |                     |         |
| <i>ins-6; daf-28; jxEx51</i>                      | 0.00±0.00 | 300 (2) |                     |         |
| <i>ins-6; daf-28; jxEx52</i>                      | 0.01±0.01 | 264 (2) |                     |         |
| ASJ-specific rescue (low)                         |           |         |                     |         |
| <i>trx-1p::ins-6 (2 ng); ofm-1p::gfp (25 ng)</i>  |           |         |                     |         |
| <i>ins-6; daf-28; jxEx61</i>                      | 0.01±0.01 | 378 (2) |                     |         |
| <i>ins-6; daf-28; jxEx62</i>                      | 0.01±0.01 | 284 (2) |                     |         |
| <i>ins-6; daf-28; jxEx63</i>                      | 0.00±0.00 | 219 (2) |                     |         |
| ASJ-specific rescue (high)                        |           |         |                     |         |
| <i>trx-1p::ins-6 (25 ng); ofm-1p::gfp (25 ng)</i> |           |         |                     |         |
| <i>ins-6; daf-28; jxEx58</i>                      | 0.00      | 134 (1) |                     |         |
| <i>ins-6; daf-28; jxEx59</i>                      | 0.00±0.00 | 412 (2) |                     |         |
| <i>ins-6; daf-28; jxEx60</i>                      | 0.00±0.00 | 241 (2) |                     |         |
| <hr/>                                             |           |         |                     |         |
| 27°C                                              |           |         |                     |         |
| <i>ofm-1p::gfp (25 ng)</i>                        |           |         |                     |         |
| <i>wild type; jxEx18*</i>                         | 0.01±0.01 | 320 (3) |                     |         |
| <i>wild type; jxEx21*</i>                         | 0.01±0.01 | 312 (3) |                     |         |
| <i>wild type; jxEx22*</i>                         | 0.01±0.01 | 345 (3) |                     |         |
| <i>daf-28; jxEx18</i>                             | 0.21±0.00 | 232 (2) | 0.08 <sup>§§</sup>  | 0.08*** |
| <i>daf-28; jxEx21</i>                             | 0.44±0.04 | 328 (3) | 0.05 <sup>§§</sup>  | 0.05*** |
| <i>daf-28; jxEx22</i>                             | 0.40±0.05 | 333 (3) | 0.05 <sup>§§</sup>  | 0.05*** |
| <i>ins-6; daf-28; jxEx18</i>                      | 0.99±0.00 | 286 (3) | 0.05 <sup>§§</sup>  |         |
| <i>ins-6; daf-28; jxEx21</i>                      | 0.98±0.00 | 292 (3) | 0.05 <sup>§§</sup>  |         |
| <i>ins-6; daf-28; jxEx22</i>                      | 0.99±0.01 | 326 (3) | 0.05 <sup>§§</sup>  |         |
| Full rescue (low)                                 |           |         |                     |         |
| <i>ins-6p::ins-6 (2 ng); ofm-1p::gfp (25 ng)</i>  |           |         |                     |         |
| <i>ins-6; daf-28; jxEx27</i>                      | 0.29±0.03 | 360 (3) | <0.05 <sup>¶¶</sup> |         |
| <i>ins-6; daf-28; jxEx28</i>                      | 0.13±0.08 | 308 (3) | <0.05 <sup>¶¶</sup> |         |
| <i>ins-6; daf-28; jxEx29</i>                      | 0.28±0.05 | 312 (3) | <0.05 <sup>¶¶</sup> |         |
| Full rescue (high)                                |           |         |                     |         |
| <i>ins-6p::ins-6 (25 ng); ofm-1p::gfp (25 ng)</i> |           |         |                     |         |
| <i>ins-6; daf-28; yxEx163</i>                     | 0.13±0.02 | 373 (3) | <0.05 <sup>¶¶</sup> |         |
| <i>ins-6; daf-28; yxEx174</i>                     | 0.10±0.02 | 357 (3) | <0.05 <sup>¶¶</sup> |         |
| <i>ins-6; daf-28; yxEx175</i>                     | 0.13±0.02 | 344 (3) | <0.05 <sup>¶¶</sup> |         |
| ASI-specific rescue (low)                         |           |         |                     |         |
| <i>str-3p::ins-6 (2 ng); ofm-1p::gfp (25 ng)</i>  |           |         |                     |         |

|                                                     |           |         |                     |                                            |
|-----------------------------------------------------|-----------|---------|---------------------|--------------------------------------------|
| <i>ins-6; daf-28; jxEx53</i>                        | 0.82±0.18 | 70 (2)  | n.s. <sup>¶¶</sup>  |                                            |
| <i>ins-6; daf-28; jxEx54</i>                        | 0.12±0.09 | 303 (3) | <0.05 <sup>¶¶</sup> |                                            |
| <i>ins-6; daf-28; jxEx64</i>                        | 0.73±0.09 | 310 (3) | <0.05 <sup>¶¶</sup> |                                            |
| <i>ins-6; daf-28; jxEx65</i>                        | 0.93±0.02 | 152 (2) | 0.08 <sup>¶¶</sup>  |                                            |
| <i>ins-6; daf-28; jxEx66</i>                        | 0.86±0.09 | 179 (2) | 0.08 <sup>¶¶</sup>  |                                            |
| ASI-specific rescue (high)                          |           |         |                     |                                            |
| <i>str-3p::ins-6 (25 ng); ofm-1p::gfp (25 ng)</i>   |           |         |                     |                                            |
| <i>ins-6; daf-28; jxEx50</i>                        | 0.14±0.10 | 339 (3) | <0.05 <sup>¶¶</sup> |                                            |
| <i>ins-6; daf-28; jxEx51</i>                        | 0.16±0.14 | 350 (3) | <0.05 <sup>¶¶</sup> |                                            |
| <i>ins-6; daf-28; jxEx52</i>                        | 0.15±0.08 | 372 (3) | <0.05 <sup>¶¶</sup> |                                            |
| ASJ-specific rescue (low)                           |           |         |                     |                                            |
| <i>trx-1p::ins-6 (2 ng); ofm-1p::gfp (25 ng)</i>    |           |         |                     |                                            |
| <i>ins-6; daf-28; jxEx61</i>                        | 0.12±0.10 | 325 (3) | <0.05 <sup>¶¶</sup> |                                            |
| <i>ins-6; daf-28; jxEx62</i>                        | 0.15±0.11 | 301 (3) | <0.05 <sup>¶¶</sup> |                                            |
| <i>ins-6; daf-28; jxEx63</i>                        | 0.22±0.14 | 342 (3) | <0.05 <sup>¶¶</sup> |                                            |
| ASJ-specific rescue (high)                          |           |         |                     |                                            |
| <i>trx-1p::ins-6 (25 ng); ofm-1p::gfp (25 ng)</i>   |           |         |                     |                                            |
| <i>ins-6; daf-28; jxEx58</i>                        | 0.11±0.07 | 301 (3) | <0.05 <sup>¶¶</sup> |                                            |
| <i>ins-6; daf-28; jxEx59</i>                        | 0.14±0.08 | 310 (3) | <0.05 <sup>¶¶</sup> |                                            |
| <i>ins-6; daf-28; jxEx60</i>                        | 0.15±0.09 | 351 (3) | <0.05 <sup>¶¶</sup> |                                            |
| <hr/>                                               |           |         |                     |                                            |
| <b>daf-28 rescues</b>                               |           |         |                     |                                            |
| <hr/>                                               |           |         |                     |                                            |
| <b>25°C</b>                                         |           |         |                     |                                            |
| <hr/>                                               |           |         |                     |                                            |
| <i>ofm-1p::gfp (25 ng)</i>                          |           |         |                     |                                            |
| <i>wild type; jxEx18</i>                            | 0.00±0.00 | 315 (3) |                     |                                            |
| <i>wild type; jxEx21</i>                            | 0.00±0.00 | 320 (3) |                     |                                            |
| <i>ins-6; daf-28; jxEx18</i>                        | 0.55±0.04 | 416 (3) | 0.04 <sup>§§</sup>  |                                            |
| <i>ins-6; daf-28; jxEx21</i>                        | 0.30±0.02 | 347 (3) | 0.04 <sup>§§</sup>  |                                            |
| Full rescue (low)                                   |           |         |                     |                                            |
| <i>daf-28p::daf-28 (2 ng); ofm-1p::gfp (25 ng)</i>  |           |         |                     |                                            |
| <i>ins-6; daf-28; jxEx107</i>                       | 0.27±0.05 | 391 (3) | 0.04 <sup>+++</sup> | 0.05 <sup>+++</sup><br>n.s. <sup>§§§</sup> |
| <i>ins-6; daf-28; jxEx108</i>                       | 0.40±0.02 | 344 (3) | 0.04 <sup>+++</sup> | 0.05 <sup>+++</sup> ,§§§                   |
| Full rescue (high)                                  |           |         |                     |                                            |
| <i>daf-28p::daf-28 (25 ng); ofm-1p::gfp (25 ng)</i> |           |         |                     |                                            |
| <i>ins-6; daf-28; jxEx103</i>                       | 0.05±0.02 | 379 (3) | 0.04 <sup>+++</sup> | 0.05 <sup>+++</sup> ,§§§                   |
| <i>ins-6; daf-28; jxEx105</i>                       | 0.15±0.07 | 352 (2) | 0.05 <sup>+++</sup> | 0.08 <sup>+++</sup> ,§§§                   |
| <hr/>                                               |           |         |                     |                                            |
| <b>27°C</b>                                         |           |         |                     |                                            |
| <hr/>                                               |           |         |                     |                                            |
| <i>ofm-1p::gfp (25 ng)</i>                          |           |         |                     |                                            |
| <i>wild type; jxEx18</i>                            | 0.04±0.03 | 255 (3) |                     |                                            |
| <i>wild type; jxEx21</i>                            | 0.04±0.03 | 282 (3) |                     |                                            |
| <i>daf-28; jxEx18</i>                               | 0.74±0.08 | 257 (3) | 0.02 <sup>§§</sup>  |                                            |
| <i>daf-28; jxEx21</i>                               | 0.82±0.08 | 308 (3) | 0.02 <sup>§§</sup>  |                                            |
| Full rescue (low)                                   |           |         |                     |                                            |
| <i>daf-28p::daf-28 (2 ng); ofm-1p::gfp (25 ng)</i>  |           |         |                     |                                            |
| <i>daf-28; jxEx112</i>                              | 0.67±0.14 | 353 (3) | 0.03 <sup>+++</sup> | n.s. <sup>¶¶¶</sup>                        |
| <i>daf-28; jxEx108</i>                              | 0.68±0.06 | 352 (3) | 0.03 <sup>+++</sup> | n.s. <sup>¶¶¶</sup>                        |
| Full rescue (high)                                  |           |         |                     |                                            |
| <i>daf-28p::daf-28 (25 ng); ofm-1p::gfp (25 ng)</i> |           |         |                     |                                            |
| <i>daf-28; jxEx110</i>                              | 0.86±0.05 | 174 (2) | 0.06 <sup>+++</sup> | n.s. <sup>¶¶¶</sup>                        |
| <i>daf-28; jxEx111</i>                              | 0.77±0.07 | 186 (2) | 0.06 <sup>+++</sup> | n.s. <sup>¶¶¶</sup>                        |
| <i>daf-28; jxEx103</i>                              | 0.59±0.21 | 299 (2) | 0.06 <sup>+++</sup> | n.s. <sup>¶¶¶</sup>                        |
| <i>daf-28; jxEx105</i>                              | 0.73±0.15 | 221 (2) | 0.06 <sup>+++</sup> | n.s. <sup>¶¶¶</sup>                        |

---

We assayed wild-type, mutant and rescued worms in parallel in independent trials at different temperatures and show statistics from the cumulative experiments. We used the Wilcoxon Mann-Whitney rank sum test to determine the statistical significance of the differences among the groups.

\*The control to which the different worms were compared in each trial.

<sup>†</sup>Compared with *daf-28(tm2308)* mutants.

<sup>‡</sup>Compared with *ins-6(tm2416)*; *daf-28(tm2308)* mutants.

<sup>§</sup>Compared with *daf-2(e1368)*; *daf-28(tm2308)* mutants.

<sup>¶</sup>Compared with *ins-6(tm2416)*; *daf-2(e1368)*; *daf-28(tm2308)* mutants.

\*\*Compared with *ins-6(tm2416)*; *daf-2(e1368)* mutants.

<sup>††</sup>Compared with wild type.

<sup>‡‡</sup>Compared with *ins-6(tm2416)*; *daf-28(tm2308)*; *ins-1(nr2091)* mutants.

<sup>§§</sup>Compared with wild type carrying the corresponding transgene.

<sup>¶¶</sup>Compared with *ins-6*; *daf-28*; *jxEx18*, *ins-6*; *daf-28*; *jxEx21* or *ins-6*; *daf-28*; *jxEx22*.

\*\*\*Compared with *ins-6*; *daf-28* mutants carrying the corresponding transgene.

<sup>†††</sup>Compared with wild type carrying *jxEx18* or *jxEx21*.

<sup>‡‡‡</sup>Compared with *ins-6*; *daf-28*; *jxEx18*.

<sup>§§§</sup>Compared with *ins-6*; *daf-28*; *jxEx21*.

<sup>¶¶¶</sup>Compared with *daf-28*; *jxEx18* or *daf-28*; *jxEx21*.

n.s., not significant ( $P > 0.1$ ). See the Fig. S1 legend concerning the lack of rescue in some animals carrying low levels of the ASI-specific *ins-6* expression construct.

---
