# Supplementary material for: Specific insulin-like peptides encode sensory information to regulate distinct developmental processes
Source: Oxford University Press journal article supplement (doi:10.1242/dev.060905), 2011-02-22
Supplement: dev060905tables2.pdf [file dev060905tables2.pdf]

Table S2. The different roles of different ILPs in regulating dauer exit

| Strain/treatment                                         | No. of animals observed/total animals | No. of trials | P-value against control (log-rank) | P-value against specified groups (logrank) | Rescue effect                     |
|----------------------------------------------------------|---------------------------------------|---------------|------------------------------------|--------------------------------------------|-----------------------------------|
| <b>25°C</b>                                              |                                       |               |                                    |                                            |                                   |
| <i>daf-2(e1368)</i>                                      | 438/599                               | 6             |                                    |                                            |                                   |
| <i>ins-6(tm2416); daf-2(e1368)</i>                       | 324/578                               | 6             | <0.0001*                           | <0.0001 <sup>†</sup>                       |                                   |
| <i>daf-2(e1368); ins-1(nr2091)</i>                       | 480/588                               | 6             | 0.0001*                            |                                            |                                   |
| <i>daf-2(e1368); daf-28(tm2308)</i>                      | 407/587                               | 6             | 0.0001*                            | <0.0001 <sup>‡</sup>                       |                                   |
| <i>ins-6; daf-2; ins-1</i>                               | 375/583                               | 6             | <0.0001*                           |                                            |                                   |
| <i>daf-2; ins-1; daf-28</i>                              | 495/579                               | 6             | 0.001*                             |                                            |                                   |
| <i>ins-6; daf-2; daf-28</i>                              | 194/596                               | 6             | <0.0001*                           | <0.0001 <sup>§</sup>                       |                                   |
| <i>ins-6; daf-2; ins-1; daf-28</i>                       | 293/605                               | 6             | <0.0001*                           | <0.0001 <sup>  </sup>                      |                                   |
| <b><i>ins-6</i> rescues</b>                              |                                       |               |                                    |                                            |                                   |
| <b>25°C</b>                                              |                                       |               |                                    |                                            |                                   |
| <i>ofm-1p::gfp</i> (25 ng)                               |                                       |               |                                    |                                            |                                   |
| <i>daf-2; jxEx18</i>                                     | 632/739                               | 8             |                                    |                                            |                                   |
| <i>daf-2; jxEx21</i>                                     | 409/516                               | 6             |                                    |                                            |                                   |
| <i>daf-2; jxEx22</i>                                     | 448/591                               | 6             |                                    |                                            |                                   |
| <i>ins-6; daf-2; jxEx18</i>                              | 484/815                               | 8             | <0.0001**                          |                                            |                                   |
| <i>ins-6; daf-2; jxEx21</i>                              | 353/592                               | 6             | <0.0001 <sup>††</sup>              |                                            |                                   |
| <i>ins-6; daf-2; jxEx22</i>                              | 342/605                               | 6             | <0.0001 <sup>††</sup>              |                                            |                                   |
| Full rescue (low)                                        |                                       |               |                                    |                                            |                                   |
| <i>ins-6p::ins-6</i> (2 ng); <i>ofm-1p::gfp</i> (25 ng)  |                                       |               |                                    |                                            |                                   |
| <i>ins-6; daf-2; jxEx27</i>                              | 541/835                               | 8             | <0.0001** <sup>††,‡‡</sup>         | <0.0001 <sup>§§,   ,***</sup>              | +** <sup>††,‡‡</sup>              |
| <i>ins-6; daf-2; jxEx28</i>                              | 632/804                               | 8             | <0.0001** <sup>††</sup>            | <0.0001 <sup>§§,   ,***</sup>              | +** <sup>††</sup>                 |
|                                                          |                                       |               | <0.05 <sup>††</sup>                |                                            | + <sup>††</sup>                   |
| <i>ins-6; daf-2; jxEx29</i>                              | 472/698                               | 7             | <0.0001** <sup>††,‡‡</sup>         | <0.0001 <sup>§§,   ,***</sup>              | +** <sup>††,‡‡</sup>              |
| Full rescue (high)                                       |                                       |               |                                    |                                            |                                   |
| <i>ins-6p::ins-6</i> (25 ng); <i>ofm-1p::gfp</i> (25 ng) |                                       |               |                                    |                                            |                                   |
| <i>ins-6; daf-2; jxEx163</i>                             | 677/809                               | 8             | n.s.**                             | <0.0001 <sup>§§,   ,***</sup>              | +**                               |
|                                                          |                                       |               | <0.02 <sup>††</sup>                |                                            | +++ <sup>††,‡‡</sup>              |
|                                                          |                                       |               | <0.0001 <sup>††</sup>              |                                            |                                   |
| <i>ins-6; daf-2; jxEx174</i>                             | 698/817                               | 8             | n.s.**                             | <0.0001 <sup>§§,   ,***</sup>              | +**                               |
|                                                          |                                       |               | <0.02 <sup>††</sup>                |                                            | +++ <sup>††,‡‡</sup>              |
|                                                          |                                       |               | <0.0001 <sup>††</sup>              |                                            |                                   |
| <i>ins-6; daf-2; jxEx175</i>                             | 578/684                               | 7             | n.s.**                             | <0.0001 <sup>§§,   ,***</sup>              | +**                               |
|                                                          |                                       |               | <0.005 <sup>††</sup>               |                                            | +++ <sup>††,‡‡</sup>              |
|                                                          |                                       |               | <0.0001 <sup>††</sup>              |                                            |                                   |
| ASI-specific rescue (low)                                |                                       |               |                                    |                                            |                                   |
| <i>str-3p::ins-6</i> (2 ng); <i>ofm-1p::gfp</i> (25 ng)  |                                       |               |                                    |                                            |                                   |
| <i>ins-6; daf-2; jxEx53</i>                              | 121/215                               | 3             | <0.0001** <sup>††,‡‡</sup>         | n.s. <sup>§§,   ,***</sup>                 | -** <sup>††,‡‡</sup>              |
| <i>ins-6; daf-2; jxEx54</i>                              | 168/257                               | 3             | <0.0001** <sup>††,‡‡</sup>         | n.s. <sup>§§,   ,***</sup>                 | -** <sup>††,‡‡</sup>              |
| <i>ins-6; daf-2; jxEx64</i>                              | 168/213                               | 2             | <0.0001** <sup>††</sup>            | <0.0001 <sup>§§,   ,***</sup>              | +** <sup>††</sup>                 |
|                                                          |                                       |               | n.s. <sup>‡‡</sup>                 |                                            | + <sup>††</sup>                   |
| <i>ins-6; daf-2; jxEx65</i>                              | 164/228                               | 2             | <0.0001** <sup>††</sup>            | <0.05 <sup>§§</sup>                        | +**                               |
|                                                          |                                       |               | 0.0005 <sup>‡‡</sup>               | n.s. <sup>   ,***</sup>                    | - <sup>††,‡‡</sup>                |
| <i>ins-6; daf-2; jxEx66</i>                              | 133/214                               | 2             | <0.0001** <sup>††,‡‡</sup>         | n.s. <sup>§§,   ,***</sup>                 | -** <sup>††,‡‡</sup>              |
| ASI-specific rescue (high)                               |                                       |               |                                    |                                            |                                   |
| <i>str-3p::ins-6</i> (25 ng); <i>ofm-1p::gfp</i> (25 ng) |                                       |               |                                    |                                            |                                   |
| <i>ins-6; daf-2; jxEx50</i>                              | 345/352                               | 3             | <0.0001** <sup>††,‡‡</sup>         | <0.0001 <sup>§§,   ,***</sup>              | +++ <sup>**<sup>††,‡‡</sup></sup> |
| <i>ins-6; daf-2; jxEx51</i>                              | 354/361                               | 3             | <0.0001** <sup>††,‡‡</sup>         | <0.0001 <sup>§§,   ,***</sup>              | +++ <sup>**<sup>††,‡‡</sup></sup> |
| <i>ins-6; daf-2; jxEx52</i>                              | 327/333                               | 3             | <0.0001** <sup>††,‡‡</sup>         | <0.0001 <sup>§§,   ,***</sup>              | +++ <sup>**<sup>††,‡‡</sup></sup> |
| ASJ-specific rescue (low)                                |                                       |               |                                    |                                            |                                   |
| <i>trx-1p::ins-6</i> (2 ng); <i>ofm-1p::gfp</i> (25 ng)  |                                       |               |                                    |                                            |                                   |
| <i>ins-6; daf-2; jxEx61</i>                              | 182/208                               | 2             | n.s.** <sup>††</sup>               | <0.0001 <sup>§§,   ,***</sup>              | +** <sup>††</sup>                 |
|                                                          |                                       |               | 0.0002 <sup>‡‡</sup>               |                                            | +++ <sup>‡‡</sup>                 |
| <i>ins-6; daf-2; jxEx62</i>                              | 185/205                               | 2             | n.s.**                             | <0.0001 <sup>§§,   ,***</sup>              | +**                               |
|                                                          |                                       |               | <0.05 <sup>††</sup>                |                                            | + <sup>††</sup>                   |
|                                                          |                                       |               | <0.05 <sup>††</sup>                |                                            | +++ <sup>‡‡</sup>                 |
| <i>ins-6; daf-2; jxEx63</i>                              | 167/197                               | 2             | <0.0001**                          | <0.0001 <sup>§§,   ,***</sup>              | +** <sup>††</sup>                 |
|                                                          |                                       |               | n.s. <sup>‡‡</sup>                 |                                            | +++ <sup>‡‡</sup>                 |
| ASJ-specific rescue (high)                               |                                       |               |                                    |                                            |                                   |
| <i>trx-1p::ins-6</i> (25 ng); <i>ofm-1p::gfp</i> (25 ng) |                                       |               |                                    |                                            |                                   |

|                             |         |   |                                                                    |                              |                                                                                   |
|-----------------------------|---------|---|--------------------------------------------------------------------|------------------------------|-----------------------------------------------------------------------------------|
| <i>ins-6; daf-2; jxEx58</i> | 278/288 | 3 | n.s. <sup>**,††</sup><br><0.0001 <sup>††</sup>                     | <0.0001 <sup>§§,¶¶,***</sup> | ++ <sup>*,††</sup>                                                                |
| <i>ins-6; daf-2; jxEx59</i> | 298/319 | 3 | <0.05 <sup>**</sup><br>n.s. <sup>††</sup><br><0.0001 <sup>††</sup> | <0.0001 <sup>§§,¶¶,***</sup> | +++ <sup>††</sup><br>+++ <sup>*,**</sup><br>++ <sup>††</sup><br>+++ <sup>††</sup> |
| <i>ins-6; daf-2; jxEx60</i> | 302/316 | 3 | <0.0001 <sup>**,††</sup><br><0.05 <sup>††</sup>                    | <0.0001 <sup>§§,¶¶,***</sup> | +++ <sup>*,††,††</sup>                                                            |

---

**daf-28 rescues**


---

## 25°C

|                                                            |         |   |                                             |                                                 |                                       |
|------------------------------------------------------------|---------|---|---------------------------------------------|-------------------------------------------------|---------------------------------------|
| <i>ofm-1p::gfp</i> (25 ng)                                 |         |   |                                             |                                                 |                                       |
| <i>daf-2; jxEx21</i>                                       | 207/316 | 3 |                                             |                                                 |                                       |
| <i>daf-2; jxEx22</i>                                       | 188/307 | 3 |                                             |                                                 |                                       |
| <i>daf-2; daf-28; jxEx21</i>                               | 169/302 | 3 | 0.01 <sup>††</sup>                          |                                                 |                                       |
| <i>daf-2; daf-28; jxEx22</i>                               | 90/298  | 3 | <0.0001 <sup>††</sup>                       |                                                 |                                       |
| Full rescue (low)                                          |         |   |                                             |                                                 |                                       |
| <i>daf-28p::daf-28</i> (2 ng); <i>ofm-1p::gfp</i> (25 ng)  |         |   |                                             |                                                 |                                       |
| <i>daf-2; daf-28; jxEx108</i>                              | 150/307 | 3 | <0.0001 <sup>††</sup><br>0.03 <sup>††</sup> | n.s. <sup>†††</sup><br><0.0001 <sup>†††</sup>   | - <sup>††</sup><br>+ <sup>††</sup>    |
| <i>daf-2; daf-28; jxEx114</i>                              | 105/197 | 3 | 0.006 <sup>††</sup><br>n.s. <sup>††</sup>   | n.s. <sup>†††</sup><br><0.0001 <sup>†††</sup>   | - <sup>††</sup><br>++ <sup>††</sup>   |
| Full rescue (high)                                         |         |   |                                             |                                                 |                                       |
| <i>daf-28p::daf-28</i> (25 ng); <i>ofm-1p::gfp</i> (25 ng) |         |   |                                             |                                                 |                                       |
| <i>daf-2; daf-28; jxEx105</i>                              | 183/268 | 3 | n.s. <sup>††</sup><br>0.002 <sup>††</sup>   | 0.0006 <sup>†††</sup><br><0.0001 <sup>†††</sup> | ++ <sup>††</sup><br>+++ <sup>††</sup> |
| <i>daf-2; daf-28; jxEx116</i>                              | 182/263 | 3 | n.s. <sup>††</sup><br>0.003 <sup>††</sup>   | 0.001 <sup>†††</sup><br><0.0001 <sup>†††</sup>  | ++ <sup>††</sup><br>+++ <sup>††</sup> |

---

**Genetic ASJ ablations**


---

## 25°C

## Intact ASJ controls

|                             |        |   |                       |  |  |
|-----------------------------|--------|---|-----------------------|--|--|
| <i>ofm-1p::gfp</i> (25 ng)  |        |   |                       |  |  |
| <i>daf-2; jxEx18</i>        | 90/106 | 1 |                       |  |  |
| <i>ins-6; daf-2; jxEx18</i> | 62/104 | 1 | <0.0001 <sup>**</sup> |  |  |

## Ablated ASJ

|                                                         |        |   |                       |                      |  |
|---------------------------------------------------------|--------|---|-----------------------|----------------------|--|
| <i>trx-1p::ICE</i> (100 ng); <i>ofm-1p::gfp</i> (25 ng) |        |   |                       |                      |  |
| <i>daf-2; jxEx100</i>                                   | 19/103 | 1 | <0.0001 <sup>**</sup> |                      |  |
| <i>daf-2; jxEx102</i>                                   | 13/62  | 1 | <0.0001 <sup>**</sup> |                      |  |
| <i>ins-6; daf-2; jxEx100</i>                            | 5/90   | 1 | <0.0001 <sup>**</sup> | 0.009 <sup>§§§</sup> |  |
| <i>ins-6; daf-2; jxEx102</i>                            | 5/100  | 1 |                       | 0.002 <sup>¶¶¶</sup> |  |

We analyzed the rates of dauer exit of *daf-2(e1368)* mutants in the presence or absence of specific insulins at 25°C and show the statistics from the cumulative experiments. We used the log-rank test to determine the statistical significance of the differences among the groups.

\*Compared with *daf-2(e1368)* mutants.

<sup>†</sup>Compared with *ins-6(tm2416)*; *daf-2(e1368)*; *ins-1(nr2091)* mutants.

<sup>‡</sup>Compared with *daf-2(e1368)*; *ins-1(nr2091)*; *daf-28(tm2308)* mutants.

<sup>§</sup>Compared with *ins-6(tm2416)*; *daf-2(e1368)*; *ins-1(nr2091)*; *daf-28(tm2308)* mutants.

<sup>¶</sup>Compared with *ins-6(tm2416)*; *daf-2(e1368)*; *daf-28(tm2308)* mutants.

\*\*Compared with *daf-2; jxEx18* animals.

<sup>††</sup>Compared with *daf-2; jxEx21* animals.

<sup>†††</sup>Compared with *daf-2; jxEx22* animals.

<sup>§§</sup>Compared with *ins-6; daf-2; jxEx18* animals.

<sup>¶¶</sup>Compared with *ins-6; daf-2; jxEx21* animals.

<sup>\*\*\*</sup>Compared with *ins-6; daf-2; jxEx22* animals.

<sup>††††</sup>Compared with *daf-2; daf-28; jxEx21* animals.

<sup>†††††</sup>Compared with *daf-2; daf-28; jxEx22* animals.

<sup>§§§</sup>Compared with *daf-2; jxEx100* animals.

<sup>¶¶¶</sup>Compared with *daf-2; jxEx102* animals.

-, no rescue; +, partial rescue; ++, full rescue; +++, over rescue.

n.s., not significant since ( $P > 0.05$ ). In the ASJ-ablated animals, most of the larvae remain in the dauer stage, which accounts for the low number of animals observed as having exited into the L4 stage (second column).

---
