# Supplementary figures and images for: Specific insulin-like peptides encode sensory information to regulate distinct developmental processes
Source: Oxford University Press journal article supplement (doi:10.1242/dev.060905), 2011-02-22

No rescue — *daf-2; jxEx18*      *ins-6p::ins-6* rescue ···· *ins-6; daf-2; jxEx27* (lo)  
 — *ins-6; daf-2; jxEx18*      ···· *ins-6; daf-2; yxEx163* (hi)

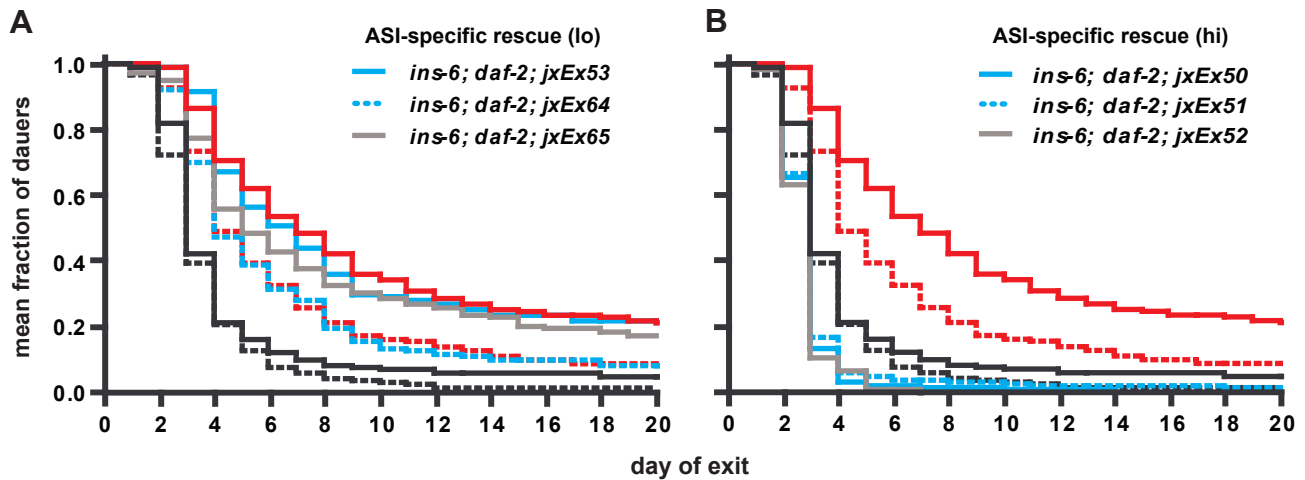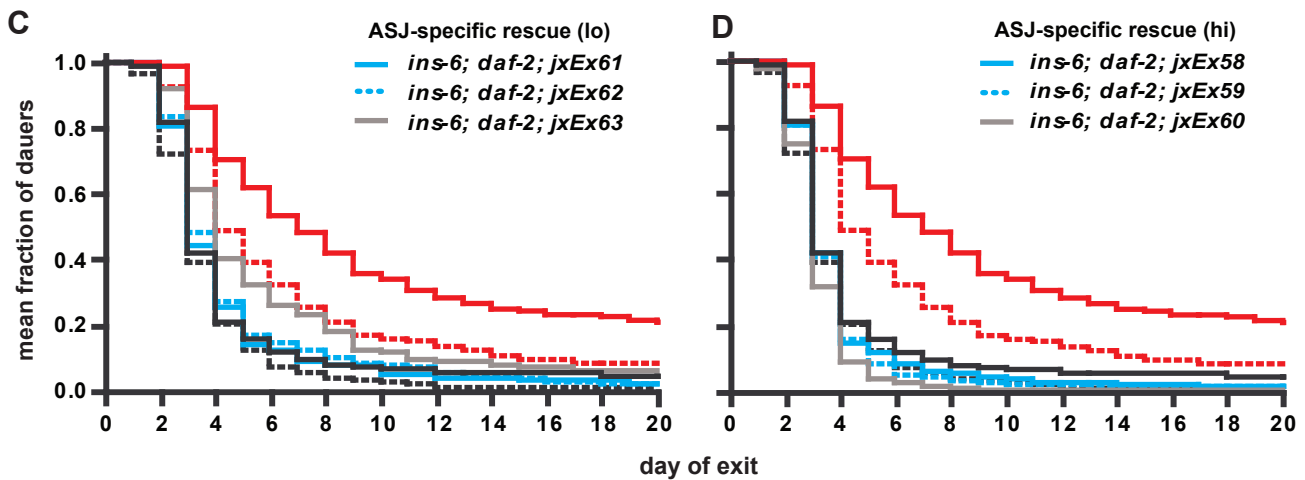

Supplement: dev060905figs2.pdf [file dev060905figs2.pdf]
